# Supplementary material
Source: PubMed Central journal article supplement (PMC3589192)
Supplement: supp_80.2.176_screening_for_impulse_control_in_PD.pdf [file supp_80.2.176_screening_for_impulse_control_in_PD.pdf]

## Screening for impulse control symptoms in patients with de novo Parkinson disease: A case-control study.

مسح لاعراض عدم التحكم في الدوافع في المرضى المصابين حديثا بالشلل الرعاش: دراسة الحالات والشواهد

**الهدف:** تحديد تواتر اعراض عدم التحكم في الدوافع والاعراض السلوكية المتعلقة بها في المرضى المصابين حديثا بالشلل الرعاش والذين لم يبدأوا العلاج بعد وكذلك في مجموعة من الاصحاء بغرض المقارنة.

**طريقة البحث:** تم استيقاق البيانات الخاصة بهذه الدراسة من مبادرة اكتشاف علامات تقدم الشلل الرعاش و هي دراسة عالمية للحالات والشواهد في 21 مركز اكايمي لعلاج أمراض اعتلال الحركة. كان عدد المساهمين في الدراسة 168 من مرضي الشلل الرعاش والذين تم تشخيصهم حديثا ولم يبدأوا العلاج بعد, كذلك ضمت الدراسة 143 من المتطوعين الاصحاء. تم قياس النتائج بتحديد وجود اعراض عدم التحكم في الدوافع والاعراض السلوكية المتعلقة بها بناء على القيم التي نصح بها الخبراء في استبيان اعراض الاندفاعية القسرية في مرضي الشلل الرعاش, (QIUP) الصيغة المختصرة.

**النتائج:** تم الحصول على بيانات QUIP كاملة ل 311 شخصا. كان تواتر اعراض عدم التحكم في الدوافع والاعراض السلوكية المتعلقة بها في مجموعتي المرضى والاصحاء كالتالي: المقامرة (1.2% مقارنة ب 0.7%) و التسوق المرضي (3% مقارنة ب 2.1%) و السلوك الجنسي المرضي (4.2% مقارنة ب 3.5%) و الاكل المفرط (7.1% مقارنة ب 10.5%) و السلوكيات المنكررة عديمة الغرض (4.8% مقارنة ب 2.1%) و الهوايات (5.4% مقارنة ب 11.9%) و أي اعراض سلوكية متعلقة اخري (18.5% مقارنة ب 20.3%). في النموذج متعدد المتغيرات لم يرتبط مرض الشلل الرعاش باي من الاعراض السابقة (P = 0.10 في كل الحالات).

**الاستنتاجات:** لا يمثل مرض الشلل الرعاش في حد ذاته خطرا من حيث الإصابة باعراض عدم التحكم في الدوافع والاعراض السلوكية المتعلقة بها مما يدعم وجود ارتباط بين تلك الاعراض و العقاقير المستخدمة في علاج المرض. بالوضع في الإعتبار وجود تلك الاعراض في 20% من المرضى الذين لم يبدأوا العلاج بعد, فهناك حاجة للمتابعة طويلة المدى لتحديد ما إذا كان هؤلاء المرضى معرضين لخطر الإصابة بهذه الاعراض عند بدأ العلاج.

Objective: To determine the frequency and correlates of impulse control and related behavior symptoms in patients with de novo, untreated Parkinson disease (PD) and healthy controls (HCs).

Methods: The Parkinson's Progression Markers Initiative is an international, multisite, case-control clinical study conducted at 21 academic movement disorders centers. Participants were recently diagnosed, untreated PD patients (n = 168) and HCs (n = 143). The outcome measures were presence of

current impulse control and related behavior symptoms based on recommended cutoff points for the Questionnaire for Impulsive–Compulsive Disorders in Parkinson's Disease (QUIP)–Short Form.

Results: There were 311 participants with complete QUIP data. Frequencies of impulse control and related behavior symptoms for patients with PD vs HCs were as follows: gambling (1.2% vs 0.7%), buying (3.0% vs 2.1%), sexual behavior (4.2% vs 3.5%), eating (7.1% vs 10.5%), punting (4.8% vs 2.1%), hobbyism (5.4% vs 11.9%), walkabout (0.6% vs 0.7%), and any impulse control or related behavior (18.5% vs 20.3%). In multivariable models, a diagnosis of PD was not associated with symptoms of any impulse control or related behavior ( $p \geq 0.10$  in all cases).

Conclusions: PD itself does not seem to confer an increased risk for development of impulse control or related behavior symptoms, which further reinforces the reported association between PD medications and impulse control disorders in PD. Given that approximately 20% of patients with newly diagnosed PD report some impulse control or related behavior symptoms, long-term follow-up is needed to determine whether such patients are at increased risk for impulse control disorder development once PD medications are initiated.

---

**Translator: Mohamed Kazamel MD, Department of Neurology, University of Alabama at Birmingham, AL**  
**Translation Reviewer: Hisham Abboud MD, Department of Neurology, Cleveland Clinic, Cleveland, OH**
